# Supplementary material for: Effects of the interaction of gunshot residue plume and cotton fabrics—an empirical study towards extensive assessment of close-range shooting distance
Source: Royal Society of Chemistry journal article supplement (doi:10.1039/d1an02001c), 2022-01-01
Supplement: d1an02001c1.pdf [file d1an02001c1.pdf]

**Supp. Table 1.** Analytical parameters of the automatic search for GSR by means of INCA Feature/GSR, Oxford Instruments Ltd., UK.

|                              |                      |
|------------------------------|----------------------|
| Magnification                | 120 x                |
| Accelerating voltage         | 20 kV                |
| Working distance             | 10 mm                |
| Image resolution             | 2048 x 1536 pixels   |
| Minimum size of the particle | 1.063 $\mu\text{m}$  |
| Area of the scanned frame    | 0. 889 $\text{mm}^2$ |
| Number of the scanned areas  | 100                  |
| Total scanned area           | 88.9 $\text{mm}^2$   |
