# Supplementary material for: Effects of the interaction of gunshot residue plume and cotton fabrics—an empirical study towards extensive assessment of close-range shooting distance
Source: Royal Society of Chemistry journal article supplement (doi:10.1039/d1an02001c), 2022-01-01
Supplement: d1an02001c2.pdf [file d1an02001c2.pdf]

**Supp. Table 2.** Frequencies of occurrence of inorganic gunshot residue detected in specimens collected from cotton woven fabric (Sample 1) from the surroundings of the entrance in the dependence of shooting distance in the range 0 – 30 cm, together with calculated average values, standard deviations (SD) and relative standard deviations (SD).

| Chemical class | Shooting distance /cm | 0             | 1             | 2             | 3             | 5             | 10            | 20            | 30            |
|----------------|-----------------------|---------------|---------------|---------------|---------------|---------------|---------------|---------------|---------------|
| <b>SbBaPb</b>  | Round 1               | 0.0215        | 0.0385        | 0.0443        | 0.0549        | 0.0309        | 0.0928        | 0.0800        | 0.1823        |
|                | Round 2               | 0.0562        | 0.0523        | 0.0590        | 0.0456        | 0.0503        | 0.0522        | 0.1061        | 0.1083        |
|                | Round 3               | 0.0360        | 0.0383        | 0.0614        | 0.0585        | 0.0341        | 0.1001        | 0.0794        | 0.0900        |
|                | <b>Average</b>        | <b>0.0379</b> | <b>0.0430</b> | <b>0.0549</b> | <b>0.0530</b> | <b>0.0384</b> | <b>0.0817</b> | <b>0.0885</b> | <b>0.1269</b> |
|                | <b>SD</b>             | <b>0.0174</b> | <b>0.0080</b> | <b>0.0093</b> | <b>0.0067</b> | <b>0.0104</b> | <b>0.0258</b> | <b>0.0152</b> | <b>0.0489</b> |
|                | <b>RSD</b>            | <b>46%</b>    | <b>19%</b>    | <b>17%</b>    | <b>13%</b>    | <b>27%</b>    | <b>32%</b>    | <b>17%</b>    | <b>39%</b>    |
| <b>SbPb</b>    | Round 1               | 0.0530        | 0.0814        | 0.2299        | 0.0770        | 0.1443        | 0.1188        | 0.2013        | 0.1185        |
|                | Round 2               | 0.0908        | 0.1275        | 0.2051        | 0.1308        | 0.1402        | 0.1343        | 0.1097        | 0.1164        |
|                | Round 3               | 0.0577        | 0.0981        | 0.1761        | 0.1658        | 0.1619        | 0.1393        | 0.1274        | 0.0951        |
|                | <b>Average</b>        | <b>0.0672</b> | <b>0.1023</b> | <b>0.2037</b> | <b>0.1245</b> | <b>0.1488</b> | <b>0.1308</b> | <b>0.1461</b> | <b>0.1100</b> |
|                | <b>SD</b>             | <b>0.0206</b> | <b>0.0233</b> | <b>0.0269</b> | <b>0.0447</b> | <b>0.0115</b> | <b>0.0107</b> | <b>0.0486</b> | <b>0.0129</b> |
|                | <b>RSD</b>            | <b>31%</b>    | <b>23%</b>    | <b>13%</b>    | <b>36%</b>    | <b>8%</b>     | <b>8%</b>     | <b>33%</b>    | <b>12%</b>    |
| <b>SbBa</b>    | Round 1               | 0.1222        | 0.3493        | 0.4079        | 0.3737        | 0.4005        | 0.4307        | 0.5822        | 0.7923        |
|                | Round 2               | 0.1268        | 0.1724        | 0.3289        | 0.4115        | 0.3099        | 0.5130        | 0.6304        | 0.6573        |
|                | Round 3               | 0.1145        | 0.2696        | 0.3056        | 0.3620        | 0.4024        | 0.3495        | 0.6967        | 0.6410        |
|                | <b>Average</b>        | <b>0.1212</b> | <b>0.2638</b> | <b>0.3475</b> | <b>0.3824</b> | <b>0.3709</b> | <b>0.4310</b> | <b>0.6364</b> | <b>0.6969</b> |
|                | <b>SD</b>             | <b>0.0062</b> | <b>0.0886</b> | <b>0.0536</b> | <b>0.0259</b> | <b>0.0528</b> | <b>0.0818</b> | <b>0.0575</b> | <b>0.0830</b> |
|                | <b>RSD</b>            | <b>5%</b>     | <b>34%</b>    | <b>15%</b>    | <b>7%</b>     | <b>14%</b>    | <b>19%</b>    | <b>9%</b>     | <b>12%</b>    |
| <b>BaPb</b>    | Round 1               | 0.0437        | 0.0501        | 0.0058        | 0.0302        | 0.0235        | 0.0224        | 0.0015        | 0.0135        |
|                | Round 2               | 0.0294        | 0.0290        | 0.0235        | 0.0139        | 0.0179        | 0.0260        | 0.0019        | 0.0037        |
|                | Round 3               | 0.0413        | 0.0422        | 0.0151        | 0.0237        | 0.0075        | 0.0210        | 0.0053        | 0.0056        |
|                | <b>Average</b>        | <b>0.1144</b> | <b>0.1213</b> | <b>0.0444</b> | <b>0.0677</b> | <b>0.0489</b> | <b>0.0694</b> | <b>0.0087</b> | <b>0.0228</b> |
|                | <b>SD</b>             | <b>0.0077</b> | <b>0.0107</b> | <b>0.0089</b> | <b>0.0082</b> | <b>0.0081</b> | <b>0.0026</b> | <b>0.0021</b> | <b>0.0052</b> |
|                | <b>RSD</b>            | <b>7%</b>     | <b>9%</b>     | <b>20%</b>    | <b>12%</b>    | <b>17%</b>    | <b>4%</b>     | <b>24%</b>    | <b>23%</b>    |
| <b>Sb</b>      | Round 1               | 0.0854        | 0.0720        | 0.1386        | 0.0889        | 0.0504        | 0.0290        | 0.0647        | 0.0670        |
|                | Round 2               | 0.0643        | 0.0873        | 0.0780        | 0.1413        | 0.1577        | 0.0652        | 0.0668        | 0.0226        |
|                | Round 3               | 0.0733        | 0.0413        | 0.0877        | 0.0577        | 0.0897        | 0.0581        | 0.0320        | 0.0812        |
|                | <b>Average</b>        | <b>0.0743</b> | <b>0.0669</b> | <b>0.1015</b> | <b>0.0960</b> | <b>0.0993</b> | <b>0.0508</b> | <b>0.0545</b> | <b>0.0569</b> |
|                | <b>SD</b>             | <b>0.0106</b> | <b>0.0234</b> | <b>0.0326</b> | <b>0.0423</b> | <b>0.0542</b> | <b>0.0192</b> | <b>0.0195</b> | <b>0.0306</b> |
|                | <b>RSD</b>            | <b>14%</b>    | <b>35%</b>    | <b>32%</b>    | <b>44%</b>    | <b>55%</b>    | <b>38%</b>    | <b>36%</b>    | <b>54%</b>    |
| <b>Pb</b>      | Round 1               | 0.6742        | 0.3985        | 0.4383        | 0.3753        | 0.3504        | 0.3062        | 0.0703        | 0.2228        |
|                | Round 2               | 0.6327        | 0.5315        | 0.3054        | 0.2569        | 0.3240        | 0.2094        | 0.0851        | 0.0917        |
|                | Round 3               | 0.6772        | 0.5106        | 0.3540        | 0.3323        | 0.3044        | 0.3321        | 0.0592        | 0.0871        |
|                | <b>Average</b>        | <b>0.6613</b> | <b>0.4802</b> | <b>0.3659</b> | <b>0.3215</b> | <b>0.3263</b> | <b>0.2826</b> | <b>0.0715</b> | <b>0.1338</b> |
|                | <b>SD</b>             | <b>0.0249</b> | <b>0.0715</b> | <b>0.0672</b> | <b>0.0599</b> | <b>0.0231</b> | <b>0.0647</b> | <b>0.0130</b> | <b>0.0770</b> |
|                | <b>RSD</b>            | <b>4%</b>     | <b>15%</b>    | <b>18%</b>    | <b>19%</b>    | <b>7%</b>     | <b>23%</b>    | <b>18%</b>    | <b>58%</b>    |
