# Supplementary material for: Effects of the interaction of gunshot residue plume and cotton fabrics—an empirical study towards extensive assessment of close-range shooting distance
Source: Royal Society of Chemistry journal article supplement (doi:10.1039/d1an02001c), 2022-01-01
Supplement: d1an02001c3.pdf [file d1an02001c3.pdf]

**Supp. Table 3.** Numbers of inorganic gunshot residue detected in specimens collected from cotton woven fabric Sample 1 from the surroundings of the entrance hole (on the outer side of the textile) for the contact shot (0 cm).

| <b>Chemical class</b> | <b>Round 1</b> | <b>Round 2</b> | <b>Round 3</b> | <b>Average</b> | <b>SD</b>   | <b>RSD</b> |
|-----------------------|----------------|----------------|----------------|----------------|-------------|------------|
| <b>SbBaPb</b>         | 199            | 354            | 319            | <b>291</b>     | <b>81</b>   | <b>28%</b> |
| <b>PbSb</b>           | 491            | 572            | 511            | <b>525</b>     | <b>42</b>   | <b>8%</b>  |
| <b>BaSb</b>           | 1132           | 799            | 1014           | <b>982</b>     | <b>169</b>  | <b>17%</b> |
| <b>BaPb</b>           | 405            | 185            | 366            | <b>319</b>     | <b>117</b>  | <b>37%</b> |
| <b>Sb</b>             | 791            | 405            | 649            | <b>615</b>     | <b>195</b>  | <b>32%</b> |
| <b>Pb</b>             | 6245           | 3987           | 5998           | <b>5410</b>    | <b>1239</b> | <b>23%</b> |
| <b>Total</b>          | <b>9263</b>    | <b>6302</b>    | <b>8857</b>    | <b>8141</b>    | <b>1605</b> | <b>20%</b> |
