# Supplementary material for: Effects of the interaction of gunshot residue plume and cotton fabrics—an empirical study towards extensive assessment of close-range shooting distance
Source: Royal Society of Chemistry journal article supplement (doi:10.1039/d1an02001c), 2022-01-01
Supplement: d1an02001c5.pdf [file d1an02001c5.pdf]

**Supp. Table 4.** Numbers of inorganic gunshot residue detected in specimens collected from cotton woven fabric Sample 2 from the surroundings of the entrance hole (on the outer side of the textile) for the contact shot (0 cm).

| <b>Chemical class</b> | Round 1     | Round 2     | Round 3     | <b>Average</b> | <b>SD</b>  | <b>RSD</b> |
|-----------------------|-------------|-------------|-------------|----------------|------------|------------|
| <b>SbBaPb</b>         | 181         | 283         | 304         | <b>256</b>     | <b>66</b>  | <b>26%</b> |
| <b>PbSb</b>           | 564         | 730         | 401         | <b>565</b>     | <b>165</b> | <b>29%</b> |
| <b>BaSb</b>           | 1751        | 1591        | 1491        | <b>1611</b>    | <b>131</b> | <b>8%</b>  |
| <b>BaPb</b>           | 185         | 98          | 182         | <b>155</b>     | <b>49</b>  | <b>32%</b> |
| <b>Sb</b>             | 571         | 357         | 485         | <b>471</b>     | <b>108</b> | <b>23%</b> |
| <b>Pb</b>             | 2858        | 1803        | 3103        | <b>2588</b>    | <b>691</b> | <b>27%</b> |
| <b>Total</b>          | <b>6110</b> | <b>4862</b> | <b>5966</b> | <b>5646</b>    | <b>683</b> | <b>12%</b> |
