# Supplementary material for: Effects of the interaction of gunshot residue plume and cotton fabrics—an empirical study towards extensive assessment of close-range shooting distance
Source: Royal Society of Chemistry journal article supplement (doi:10.1039/d1an02001c), 2022-01-01
Supplement: d1an02001c7.pdf [file d1an02001c7.pdf]

**Supp. Table 7.** Numbers of inorganic gunshot residue detected in specimens collected from circumference of contact shot openings in fragments of knitted cotton fabric (Sample 5) from the outer side as well as from the inner side of each shot fragment of the fabric.

| Chemical class | Sample 5 - outer side |             |             |             |            |            | Sample 5 - inner side |             |             |             |            |            |
|----------------|-----------------------|-------------|-------------|-------------|------------|------------|-----------------------|-------------|-------------|-------------|------------|------------|
|                | Round 1               | Round 2     | Round 3     | Average     | SD         | RSD        | Round 1               | Round 2     | Round 3     | Average     | SD         | RSD        |
| <b>SbBaPb</b>  | 98                    | 79          | 117         | <b>98</b>   | <b>19</b>  | <b>19%</b> | 95                    | 148         | 132         | <b>125</b>  | <b>27</b>  | <b>22%</b> |
| <b>PbSb</b>    | 269                   | 289         | 204         | <b>254</b>  | <b>44</b>  | <b>17%</b> | 400                   | 294         | 473         | <b>389</b>  | <b>90</b>  | <b>23%</b> |
| <b>BaSb</b>    | 228                   | 192         | 301         | <b>240</b>  | <b>56</b>  | <b>23%</b> | 892                   | 842         | 1002        | <b>912</b>  | <b>82</b>  | <b>9%</b>  |
| <b>BaPb</b>    | 118                   | 109         | 97          | <b>108</b>  | <b>11</b>  | <b>10%</b> | 75                    | 102         | 57          | <b>78</b>   | <b>23</b>  | <b>29%</b> |
| <b>Sb</b>      | 386                   | 437         | 184         | <b>336</b>  | <b>134</b> | <b>40%</b> | 252                   | 224         | 268         | <b>248</b>  | <b>22</b>  | <b>9%</b>  |
| <b>Pb</b>      | 1329                  | 996         | 1467        | <b>1264</b> | <b>242</b> | <b>19%</b> | 1591                  | 1327        | 1477        | <b>1465</b> | <b>132</b> | <b>9%</b>  |
| <b>Total</b>   | <b>2428</b>           | <b>2102</b> | <b>2370</b> | <b>2300</b> | <b>174</b> | <b>8%</b>  | <b>3305</b>           | <b>2937</b> | <b>3409</b> | <b>3217</b> | <b>248</b> | <b>8%</b>  |
